# Supplementary material for: Comparative Safety Analysis of Empagliflozin in Type 2 Diabetes Mellitus Patients with Chronic Kidney Disease versus Normal Kidney Function: A Nationwide Cohort Study in Korea
Source: MDPI journal article supplement (doi:10.3390/pharmaceutics15102394), 2023-09-27
Supplement: s1 [file s1]

**Table S1.** Operational definitions of outcomes

|                                             | <b>Operational Definition</b>                                                                                                                                                                                                                                                                                                                                                                                                                                                                                                                                                                                                                                                                                                                                                                                                                                                                                  |
|---------------------------------------------|----------------------------------------------------------------------------------------------------------------------------------------------------------------------------------------------------------------------------------------------------------------------------------------------------------------------------------------------------------------------------------------------------------------------------------------------------------------------------------------------------------------------------------------------------------------------------------------------------------------------------------------------------------------------------------------------------------------------------------------------------------------------------------------------------------------------------------------------------------------------------------------------------------------|
| <b>Myocardial infarction</b>                | Myocardial infarction (I21) with procedure code                                                                                                                                                                                                                                                                                                                                                                                                                                                                                                                                                                                                                                                                                                                                                                                                                                                                |
| <b>Hospitalization for unstable angina</b>  | Unstable angina (I20) with hospitalization                                                                                                                                                                                                                                                                                                                                                                                                                                                                                                                                                                                                                                                                                                                                                                                                                                                                     |
| <b>Coronary revascularization procedure</b> | Procedure code [Coronary angiography (HA670), aortocoronary venous bypass graft angiography (HA680, HA681, HA682), percutaneous transluminal coronary angioplasty (M6551, M6552), percutaneous transcatheter placement of intracoronary stent (M6561, M6562, M6563, M6564), percutaneous transluminal coronary atherectomy (M6571, M6572), mechanical thrombectomy (M6633), percutaneous thrombus removal (M6634), vascular bypass operation (O1641, O1642, O1647, OA641, OA642, OA647)]                                                                                                                                                                                                                                                                                                                                                                                                                       |
| <b>Stroke</b>                               | Cerebrovascular diseases (I60-I64) with procedure code                                                                                                                                                                                                                                                                                                                                                                                                                                                                                                                                                                                                                                                                                                                                                                                                                                                         |
| <b>Transient ischemic attack</b>            | Transient ischemic attack (G45)                                                                                                                                                                                                                                                                                                                                                                                                                                                                                                                                                                                                                                                                                                                                                                                                                                                                                |
| <b>Hospitalization for heart failure</b>    | Heart failure (I50)<br>Left ventricular failure (I50.1)<br>Left ventricular failure (I50.1)<br>Cardiogenic shock (R57.0)<br>Pulmonary edema (J81)<br>Systolic (congestive) heart failure (I50.2)                                                                                                                                                                                                                                                                                                                                                                                                                                                                                                                                                                                                                                                                                                               |
| <b>Hypoglycemic adverse event</b>           | Type 2 diabetes mellitus with hypoglycemia (E11.63), other specified diabetes mellitus with hypoglycemia (E13.64), nondiabetic hypoglycemic coma (E15), drug-induced hypoglycemia without coma (E16.0), other hypoglycemia (E16.1), hypoglycemia, unspecified (E16.2)                                                                                                                                                                                                                                                                                                                                                                                                                                                                                                                                                                                                                                          |
| <b>Urinary tract infection</b>              | Urinary tract infection, site not specified (N39.0)<br>Cystitis (N30)<br>Abnormal findings on microbiological examination of urine (R82.7)<br>Acute pyelonephritis (N10), Chronic tubulo-interstitial nephritis (N11), Tubulo-interstitial nephritis, not specified (N12)<br>Renal and perinephric abscess (N15.1) with any of above codes                                                                                                                                                                                                                                                                                                                                                                                                                                                                                                                                                                     |
| <b>Genital tract infection</b>              | Candida balanitis(B37.41)<br>Balanoposthitis (N48.1)<br>Cellulitis of corpus cavernosum and penis (N48.21)<br>Epididymitis and orchitis (N45)<br>Other inflammatory disorders of penis (N48.2)<br>Acute prostatitis (N41.0)<br>Chronic prostatitis (N41.1)<br>Other inflammatory diseases of prostate (N41.8)<br>Inflammatory disease of prostate, unspecified (N41.9)<br>Abscess of prostate (N41.2)<br>Inflammatory diseases of prostate (N41)<br>Acute vaginitis (N76.0)<br>Subacute and chronic vaginitis (N76.1)<br>Acute vulvitis (N76.2)<br>Subacute and chronic vulvitis (N76.3)<br>Other specified inflammation of vagina and vulva (N76.8)<br>Vaginitis, vulvitis and vulvovaginitis in diseases classified elsewhere (N77.1)<br>Vulval abscess (N76.4)<br>candida of vulva and vagina (B37.3)<br>vaginitis and vulvovaginitis (N77.1, N76.0-N76.3)<br>Candidiasis of other urogenital sites (B37.4) |

|                              |                                                                                                                                                                                                                                                                                                                                                                                                                                                                                                                                                                                                                                                                                                                                                                                                                                                                                                                                                                                                                                                                                                                                                                                                                                                                                                                                                                                                                                                                                                                                                                                                                           |
|------------------------------|---------------------------------------------------------------------------------------------------------------------------------------------------------------------------------------------------------------------------------------------------------------------------------------------------------------------------------------------------------------------------------------------------------------------------------------------------------------------------------------------------------------------------------------------------------------------------------------------------------------------------------------------------------------------------------------------------------------------------------------------------------------------------------------------------------------------------------------------------------------------------------------------------------------------------------------------------------------------------------------------------------------------------------------------------------------------------------------------------------------------------------------------------------------------------------------------------------------------------------------------------------------------------------------------------------------------------------------------------------------------------------------------------------------------------------------------------------------------------------------------------------------------------------------------------------------------------------------------------------------------------|
|                              | Candida of other urogenital sites (B37.48)                                                                                                                                                                                                                                                                                                                                                                                                                                                                                                                                                                                                                                                                                                                                                                                                                                                                                                                                                                                                                                                                                                                                                                                                                                                                                                                                                                                                                                                                                                                                                                                |
| <b>Volume depletion</b>      | Hypotension (I95.9)<br>Syncope and collapse (R55)<br>Dehydration (E86.0), Volume depletion, unspecified (E86.8)<br>Orthostatic hypotension (I95.1)<br>Nonspecific low blood-pressure reading (R03.1)<br>Hypovolemia (E86.1)                                                                                                                                                                                                                                                                                                                                                                                                                                                                                                                                                                                                                                                                                                                                                                                                                                                                                                                                                                                                                                                                                                                                                                                                                                                                                                                                                                                               |
| <b>Acute kidney injury</b>   | Acute kidney failure (N17)                                                                                                                                                                                                                                                                                                                                                                                                                                                                                                                                                                                                                                                                                                                                                                                                                                                                                                                                                                                                                                                                                                                                                                                                                                                                                                                                                                                                                                                                                                                                                                                                |
| <b>Diabetic ketoacidosis</b> | Diabetic ketoacidosis (E11.1, E13.1, E14.1)                                                                                                                                                                                                                                                                                                                                                                                                                                                                                                                                                                                                                                                                                                                                                                                                                                                                                                                                                                                                                                                                                                                                                                                                                                                                                                                                                                                                                                                                                                                                                                               |
| <b>Thromboembolic event</b>  | Other venous embolism and thrombosis (I82)<br>Pulmonary embolism (I26)<br>Phlebitis and thrombophlebitis (I80)<br>Other retinal vein occlusions (H34.8)<br>Phlebitis and thrombophlebitis, superficial (I80.0)<br>Complication of vein following a procedure (T81.7)<br>Vascular disorders of intestine (K55)<br>Postthrombotic syndrome (I87.0)                                                                                                                                                                                                                                                                                                                                                                                                                                                                                                                                                                                                                                                                                                                                                                                                                                                                                                                                                                                                                                                                                                                                                                                                                                                                          |
| <b>Bone fracture</b>         | Fracture of sternum (S22.2)<br>Fracture of rib (S22.3)<br>Multiple fractures of ribs (S22.4)<br>Foot Fracture (S92)<br>Fracture of upper end of humerus (S42.2)<br>Fracture of shaft of humerus (S42.3)<br>Fracture of lower end of humerus (S42.4)<br>Fracture of medial malleolus (S82.5)<br>Fracture of lateral malleolus (S82.6)<br>Pathological fracture, not elsewhere classified (M84.4)<br>Fracture of sacrum (S32.1)<br>Fracture of ilium (S32.3)<br>Fracture of other and unspecified parts of lumbar spine and pelvis (S32.8)<br>Fracture of ischium (S32.82)<br>Fracture of upper end of radius (S52.1)<br>Fracture of shaft of radius (S52.3)<br>Fracture of lower end of radius (S52.5)<br>Fracture of tooth (S02.5)<br>Fracture of navicular [scaphoid] bone of hand (S62.0)<br>Fracture of other carpal bone(s) (S62.1)<br>Fracture of thumb (S62.5)<br>Fracture of other finger (S62.6)<br>Multiple fracture of fingers (S62.7)<br>Fracture of upper end of tibia (S82.1)<br>Fracture of shaft of tibia (S82.2)<br>Fracture of lower end of tibia (S82.3)<br>Fracture of skull and facial bones (S02, excluding S02.5, S02.6)<br>Fracture of first metacarpal bone (S62.2)<br>Fracture of other metacarpal bone (S62.3)<br>Multiple fracture of metacarpal bones (S62.4)<br>Fracture of other and unspecified parts of wrist and hand (S62.8)<br>Collapsed vertebra (M48.5)<br>Fracture of head and neck of femur (S72.0)<br>Fracture of femur (S72)<br>Fracture of fibula alone (S82.4)<br>Fracture of other and unspecified parts of lumbar spine and pelvis (S32.8)<br>Fracture of acetabulum (S32.4) |

---

Fracture of lumbar vertebra (S32.0)  
Osteoporosis with pathological fracture (M80)  
Fracture of patella (S82.0)  
Fracture of clavicle (S42.0)  
Multiple fracture of forearm (S52.7)  
Fracture of other parts of forearm (S52.8)  
Unspecified fracture of forearm (S52.9)  
Fracture of mandible (S02.6)  
Fracture of upper end of ulna (S52.0)  
Fracture of shaft of ulna (S52.2)  
Fracture of shafts of both ulna and radius (S52.4)  
Fracture of lower end of both ulna and radius (S52.6)  
Fracture of coccyx (S32.2)  
Other fractures of lower leg (S82.8)  
Unspecified fracture of lower leg (S82.9)  
Fracture of bone following insertion of orthopaedic implant,  
joint prosthesis, or bone plate (M96.6)  
Fracture of pubis (S32.5)  
Fracture of cervical vertebra and other parts of neck (S12)  
Fracture of scapula (S42.1)  
Fracture of base of skull (S02.1)  
Fracture of thoracic vertebra (S22.0)  
Included in each fracture code

---

**Table S2.** Baseline characteristics of patients with chronic kidney disease before and after match

|                            | Pre-Match                |                           |        | Post-Match              |                           |        |
|----------------------------|--------------------------|---------------------------|--------|-------------------------|---------------------------|--------|
| Variables                  | Sitagliptin<br>N= 20,136 | Empagliflozin<br>N= 6,211 | STD    | Sitagliptin<br>N= 6,170 | Empagliflozin<br>N= 6,170 | STD    |
| Sex, male                  | 11632 (57.8)             | 3478 (56)                 | -0.09  | 3534 (57.3)             | 3464 (56.1)               | -0.02  |
| Age, year                  | 56.8 ± 12.7              | 50.8 ± 12.2               | -0.48  | 50.8 ± 12.8             | 50.9 ± 12.1               | 0.01   |
| Insurance type             |                          |                           |        |                         |                           |        |
| Normal                     | 18730 (93.0)             | 5886 (94.8)               | 0.07   | 5842 (94.7)             | 5846 (94.8)               | 0.004  |
| Medicaid                   | 1313 (6.5)               | 305 (4.9)                 |        | 307 (5)                 | 304 (4.9)                 |        |
| No charge                  | 93 (0.5)                 | 20 (0.3)                  |        | 21 (0.3)                | 20 (0.3)                  |        |
| Number of Inpatient visit  | 1.1 ± 2.6                | 0.5 ± 1.2                 | -0.3   | 0.5 ± 1.3               | 0.5 ± 1.3                 | 0.003  |
| Number of outpatient visit | 38.5 ± 40.7              | 25.5 ± 23.9               | -0.27  | 29.0 ± 28.4             | 29.0 ± 28.4               | 0.002  |
| Index year                 |                          |                           |        |                         |                           |        |
| 2016                       | 6060 (30.1)              | 1565 (25.2)               | 0.13   | 1545 (25)               | 1564 (25.4)               | 0.02   |
| 2017                       | 9915 (49.2)              | 3078 (49.6)               |        | 3106 (50.3)             | 3057 (49.6)               |        |
| 2018                       | 4161 (20.7)              | 1568 (25.3)               |        | 1519 (24.6)             | 1549 (25.1)               |        |
| Charlson comorbidity index |                          |                           |        |                         |                           |        |
| 0                          | 10 (0.1)                 | 1 (0)                     | 0.08   | 2 (0)                   | 1 (0)                     | 0.02   |
| 1                          | 1099 (5.5)               | 413 (6.7)                 |        | 416 (6.7)               | 408 (6.6)                 |        |
| 2                          | 1428 (7.1)               | 532 (8.6)                 |        | 503 (8.2)               | 523 (8.5)                 |        |
| 3                          | 17599 (87.4)             | 5265 (84.8)               |        | 5249 (85.1)             | 5238 (84.9)               |        |
| CV risk factor             |                          |                           |        |                         |                           |        |
| CAD                        | 7170 (35.6)              | 2067 (33.3)               | -0.05  | 1946 (31.5)             | 2054 (33.3)               | 0.04   |
| Multi vessel CAD           | 3797 (18.9)              | 1137 (18.3)               | -0.01  | 1080 (17.5)             | 1126 (18.3)               | 0.02   |
| MI                         | 389 (1.9)                | 97 (1.6)                  | -0.03  | 110 (1.8)               | 95 (1.5)                  | -0.02  |
| CABG                       | 1752 (8.7)               | 433 (7.0)                 | -0.06  | 444 (7.2)               | 430 (7)                   | -0.01  |
| Stroke                     | 1103 (5.5)               | 181 (2.9)                 | -0.13  | 190 (3.1)               | 181 (2.9)                 | -0.01  |
| PAD                        | 1172 (5.8)               | 149 (2.4)                 | -0.17  | 170 (2.8)               | 148 (2.4)                 | -0.02  |
| DM circulation             | 3370 (16.7)              | 1092 (17.6)               | 0.02   | 1078 (17.5)             | 1083 (17.6)               | 0.002  |
| DM foot                    | 7 (0.0)                  | 0 (0.0)                   | -0.03  | 0 (0.0)                 | 0 (0.0)                   | 0      |
| DM nephropathy             | 18402 (91.4)             | 5868 (94.5)               | 0.12   | 5789 (93.8)             | 5828 (94.5)               | 0.03   |
| DM neuropathy              | 3970 (19.7)              | 1096 (17.7)               | -0.05  | 1111 (18)               | 1089 (17.7)               | -0.01  |
| DM other Complications     | 14396 (71.5)             | 4106 (66.1)               | -0.11  | 4101 (66.5)             | 4085 (66.2)               | -0.01  |
| Hyperglycemia              | 841 (4.2)                | 140 (2.3)                 | -0.11  | 126 (2)                 | 140 (2.3)                 | 0.02   |
| Comorbidities              |                          |                           |        |                         |                           |        |
| Hypertension               | 14595 (72.5)             | 4359 (70.2)               | -0.05  | 4312 (69.9)             | 4330 (70.2)               | 0.006  |
| Edema                      | 3017 (15)                | 704 (11.3)                | -0.11  | 704 (11.4)              | 696 (11.3)                | -0.004 |
| Kidney stone               | 441 (2.2)                | 123 (2.0)                 | -0.01  | 120 (1.9)               | 123 (2.0)                 | 0.004  |
| Osteoarthritis             | 7062 (35.1)              | 1813 (29.2)               | -0.13  | 1832 (29.7)             | 1808 (29.3)               | -0.01  |
| Other arthritis            | 6679 (33.2)              | 1707 (27.5)               | -0.12  | 1672 (27.1)             | 1698 (27.5)               | 0.01   |
| PUD                        | 5921 (29.4)              | 1609 (25.9)               | -0.08  | 1619 (26.2)             | 1596 (25.9)               | -0.01  |
| Pancreatitis               | 414 (2.1)                | 125 (2)                   | -0.003 | 126 (2)                 | 124 (2)                   | -0.002 |
| UC                         | 35 (0.2)                 | 9 (0.1)                   | -0.007 | 12 (0.2)                | 9 (0.2)                   | -0.01  |

|                          |              |             |        |             |             |        |
|--------------------------|--------------|-------------|--------|-------------|-------------|--------|
| Crohn                    | 8 (0)        | 4 (0.1)     | 0.00   | 3 (0.1)     | 4 (0.1)     | 0.000  |
| Asthma                   | 3227 (16)    | 910 (14.7)  | -0.04  | 946 (15.3)  | 899 (14.6)  | -0.02  |
| COPD                     | 842 (4.2)    | 166 (2.7)   | -0.08  | 182 (3)     | 164 (2.7)   | -0.02  |
| Bladder stone            | 19 (0.1)     | 3 (0.1)     | -0.02  | 2 (0)       | 3 (0.1)     | 0.01   |
| Dementia                 | 2626 (13)    | 527 (8.5)   | -0.15  | 516 (8.4)   | 525 (8.5)   | 0.005  |
| Electrolyte Imbalance    | 3953 (19.6)  | 617 (9.9)   | -0.28  | 576 (9.3)   | 617 (10)    | 0.02   |
| Glaucoma /Cataract       | 6504 (32.3)  | 1782 (28.7) | -0.08  | 1775 (28.8) | 1766 (28.6) | -0.003 |
| HONK                     | 204 (1)      | 44 (0.7)    | -0.03  | 40 (0.7)    | 44 (0.7)    | 0.01   |
| HTN nephropathy          | 1401 (7)     | 379 (6.1)   | -0.03  | 354 (5.7)   | 377 (6.1)   | 0.02   |
| Hyperthyroid disease     | 658 (3.3)    | 176 (2.8)   | -0.03  | 170 (2.8)   | 175 (2.8)   | 0.005  |
| Hypothyroid disease      | 2261 (11.2)  | 696 (11.2)  | -0.001 | 722 (11.7)  | 685 (11.1)  | -0.02  |
| Osteomyelitis            | 272 (1.4)    | 38 (0.6)    | -0.08  | 32 (0.5)    | 38 (0.6)    | 0.01   |
| Pneumonia                | 2239 (11.1)  | 459 (7.4)   | -0.13  | 493 (8)     | 457 (7.4)   | -0.02  |
| Skin infection           | 1096 (5.4)   | 295 (4.8)   | -0.03  | 296 (4.8)   | 290 (4.7)   | -0.005 |
| Glucose-lowering therapy |              |             |        |             |             |        |
| Metformin                | 13681 (67.9) | 4788 (77.1) | 0.2    | 4731 (76.7) | 4752 (77)   | 0.008  |
| Insulins                 | 5973 (29.7)  | 1644 (26.5) | -0.07  | 1575 (25.5) | 1620 (26.3) | 0.02   |
| SUs                      | 10409 (51.7) | 3205 (51.6) | -0.02  | 3154 (51.1) | 3178 (51.5) | 0.01   |
| Glitazones               | 2576 (12.8)  | 962 (15.5)  | 0.08   | 978 (15.9)  | 954 (15.5)  | -0.01  |
| GLP-1 agonists           | 92 (0.5)     | 87 (1.4)    | 0.1    | 65 (1.1)    | 78 (1.3)    | 0.02   |
| AGIs                     | 988 (4.9)    | 196 (3.2)   | -0.09  | 225 (3.7)   | 195 (3.2)   | -0.03  |
| Meglitinides             | 422 (2.1)    | 118 (1.9)   | -0.01  | 98 (1.6)    | 113 (1.8)   | 0.02   |
| Co-medications           |              |             |        |             |             |        |
| Anticoagulants           | 9958 (49.5)  | 2838 (45.7) | -0.1   | 2837 (46)   | 2825 (45.8) | 0.01   |
| Antiplatelets            | 9682 (48.1)  | 2781 (44.8) | -0.07  | 2783 (45.1) | 2768 (44.9) | -0.05  |
| Heparins                 | 841 (4.2)    | 184 (3)     | -0.07  | 190 (3.1)   | 182 (3)     | -0.01  |
| Thrombolytics            | 79 (0.4)     | 3 (0.1)     | -0.07  | 3 (0.1)     | 3 (0.1)     | 0.01   |
| Statins                  | 13847 (68.8) | 4813 (77.5) | 0.2    | 4750 (77)   | 4775 (77.4) | 0.01   |
| Other lipid Lowerings    | 2704 (13.4)  | 1178 (19)   | 0.2    | 1129 (18.3) | 1165 (18.9) | 0.01   |
| Nitrates                 | 1808 (9.0)   | 446 (7.2)   | -0.07  | 451 (7.3)   | 443 (7.2)   | -0.005 |
| Digoxin                  | 1609 (8.0)   | 394 (6.3)   | -0.06  | 392 (6.4)   | 391 (6.3)   | -0.001 |
| ACEIs                    | 898 (4.5)    | 254 (4.1)   | -0.02  | 255 (4.1)   | 252 (4.1)   | -0.002 |
| ARBs                     | 11807 (58.6) | 3749 (60.4) | 0.01   | 3752 (60.8) | 3723 (60.3) | -0.01  |
| Entresto                 | 3 (0)        | 2 (0)       | 0.05   | 0 (0)       | 2 (0)       | 0.03   |
| Other Anti HTNs          | 11046 (54.9) | 3014 (48.5) | -0.1   | 3009 (48.8) | 2995 (48.5) | -0.005 |
| Loop diuretics           | 3706 (18.4)  | 637 (10.3)  | -0.2   | 638 (10.3)  | 632 (10.2)  | -0.003 |
| Other diuretics          | 4978 (24.7)  | 1478 (23.8) | -0.02  | 1509 (24.5) | 1469 (23.8) | -0.02  |
| Antianxieties            | 8676 (43.1)  | 2190 (35.3) | -0.2   | 2131 (34.5) | 2176 (35.3) | 0.02   |
| Antipsychotics           | 1162 (5.8)   | 168 (2.7)   | -0.2   | 163 (2.6)   | 168 (2.7)   | 0.005  |
| Antidepressants          | 3711 (18.4)  | 898 (14.5)  | -0.1   | 891 (14.4)  | 893 (14.5)  | 0.001  |
| Dementia                 | 2626 (13)    | 527 (8.5)   | -0.1   | 516 (8.4)   | 525 (8.5)   | 0.005  |

|                 |              |             |       |             |             |       |
|-----------------|--------------|-------------|-------|-------------|-------------|-------|
| Antiparkinsons  | 619 (3.1)    | 117 (1.9)   | -0.08 | 114 (1.9)   | 117 (1.9)   | 0.004 |
| Anticonvulsants | 491 (2.4)    | 90 (1.5)    | -0.07 | 90 (1.5)    | 90 (1.5)    | 0     |
| NSAIDs          | 15558 (77.3) | 4812 (77.5) | 0.005 | 4828 (78.3) | 4779 (77.5) | -0.02 |
| Bisphosphonates | 858 (4.3)    | 156 (2.5)   | -0.1  | 140 (2.3)   | 156 (2.5)   | 0.02  |
| Opioids         | 9918 (49.3)  | 2656 (42.8) | -0.1  | 2610 (42.3) | 2639 (42.8) | 0.01  |

Values are represented as mean  $\pm$  standard deviation or number (%); ACEis, angiotensin-converting enzyme inhibitors; AGIs,  $\alpha$ -glucosidase Inhibitors; ARBs, angiotensin II receptor blockers; CABG, coronary artery bypass graft; CAD, coronary artery disease; COPD, chronic obstructive pulmonary disease; CV, cardiovascular; DM, diabetes mellitus; HONK, hyperglycaemic hyperosmolar nonketotic coma; HTN, hypertensive; MI, myocardial infarction; NSAIDs, non-steroidal anti-inflammatory drugs; PAD, peripheral artery disease; PUD, peptic ulcer disease; STD, standardized difference; SUs, sulfonylureas; UC, ulcerative colitis;

**Table S3.** Baseline characteristics of patients with normal kidney function before and after propensity matching

|                            | Pre-Match                |                           |        | Post-Match              |                           |         |
|----------------------------|--------------------------|---------------------------|--------|-------------------------|---------------------------|---------|
| Variables                  | Sitagliptin<br>N=284,665 | Empagliflozin<br>N=73,325 | STD    | Sitagliptin<br>N=73,217 | Empagliflozin<br>N=73,217 | STD     |
| Sex, male                  | 167,073 (58.7)           | 41,003 (55.9)             | -0.02  | 40,896 (55.9)           | 40,955 (55.9)             | -0.001  |
| Age, year                  | 54.5 (13)                | 49.8 (12.5)               | -0.4   | 49.9 (13.1)             | 49.8 (12.5)               | -0.01   |
| Insurance type             |                          |                           |        |                         |                           |         |
| Normal                     | 270,362 (95)             | 70,076 (95.6)             | 0.03   | 69,960 (95.6)           | 69,975 (95.6)             | 0.002   |
| Medicaid                   | 13,453 (4.7)             | 3,106 (4.2)               |        | 3,117 (4.3)             | 3,099 (4.2)               |         |
| No charge                  | 850 (0.3)                | 143 (0.2)                 |        | 140 (0.2)               | 143 (0.2)                 |         |
| Number of Inpatient visit  | 0.6 (1.9)                | 0.4 (1.3)                 | -0.1   | 0.4 (1.5)               | 0.4 (1.3)                 | -0.01   |
| Number of outpatient visit | 25.8 (27.7)              | 25.1 (25.5)               | -0.03  | 25.2 (26.3)             | 25.1 (25.5)               | -0.01   |
| Index year                 |                          |                           |        |                         |                           |         |
| 2016                       | 83,000 (29.2)            | 16,199 (22.1)             | 0.2    | 16,028 (21.9)           | 16,198 (22.1)             | 0.007   |
| 2017                       | 141,130 (49.6)           | 38,370 (52.3)             |        | 38,571 (52.7)           | 38,324 (52.3)             |         |
| 2018                       | 60,533 (21.3)            | 18,756 (25.6)             |        | 18,618 (25.4)           | 18,695 (25.5)             |         |
| Charlson comorbidity index |                          |                           |        |                         |                           |         |
| 0                          | 26,481 (9.3)             | 5,108 (7.0)               | 0.1    | 4,899 (6.7)             | 5,107 (7.0)               | 0.01    |
| 1                          | 31,973 (11.2)            | 7,521 (10.3)              |        | 7,618 (10.4)            | 7,514 (10.3)              |         |
| 2                          | 48,840 (17.2)            | 12,691 (17.3)             |        | 12,659 (17.3)           | 12,680 (17.3)             |         |
| 3                          | 177,371 (62.3)           | 48,005 (65.5)             |        | 48,041 (65.6)           | 47,916 (65.4)             |         |
| CV risk factor             |                          |                           |        |                         |                           |         |
| CAD                        | 61,937 (21.8)            | 18,047 (24.6)             | 0.07   | 18,087 (24.7)           | 18,004 (24.6)             | -0.003  |
| Multi vessel CAD           | 29,888 (10.5)            | 9,505 (13.0)              | 0.08   | 9,469 (12.9)            | 9,473 (12.9)              | 0.0002  |
| MI                         | 3,262 (1.2)              | 1,321 (1.8)               | 0.05   | 1,319 (1.8)             | 1,314 (1.8)               | -0.0005 |
| CABG                       | 496 (0.2)                | 176 (0.2)                 | 0.01   | 159 (0.2)               | 176 (0.2)                 | 0.005   |
| Stroke                     | 9,386 (3.3)              | 1,737 (2.4)               | -0.006 | 1,771 (2.4)             | 1,735 (2.4)               | -0.003  |
| PAD                        | 4,919 (1.7)              | 1,274 (1.7)               | 0.0007 | 1,331 (1.8)             | 1,274 (1.7)               | -0.006  |
| DM circulation             | 23,177 (8.1)             | 7,648 (10.4)              | 0.08   | 7,644 (10.4)            | 7,623 (10.4)              | -0.001  |
| DM foot                    | 26 (0.01)                | 10 (0.01)                 | 0.004  | 8 (0.01)                | 9 (0.01)                  | 0.001   |
| DM nephropathy             | -                        | -                         | -      | -                       | -                         | -       |
| DM neuropathy              | 29,804 (10.5)            | 8,884 (12.1)              | 0.05   | 9,009 (12.3)            | 8,856 (12.1)              | -0.006  |
| DM other Complications     | 204,338 (71.8)           | 53,566 (73.1)             | 0.03   | 53,920 (73.6)           | 53,480 (73.0)             | -0.01   |
| Hyperglycemia              | 4,087 (1.4)              | 919 (1.3)                 | -0.02  | 913 (1.3)               | 919 (1.3)                 | 0.0007  |
| Comorbidities              |                          |                           |        |                         |                           |         |
| Hypertension               | 161,970 (56.9)           | 44,394 (60.5)             | 0.07   | 44,604 (60.9)           | 44,306 (60.5)             | -0.008  |
| Edema                      | 25,656 (9.0)             | 6,727 (9.2)               | 0.006  | 6,823 (9.3)             | 6,714 (9.2)               | -0.005  |
| Kidney stone               | 4,055 (1.4)              | 1,129 (1.5)               | 0.01   | 1,147 (1.6)             | 1,128 (1.5)               | -0.002  |
| Osteoarthritis             | 86,191 (30.3)            | 20,471 (27.9)             | -0.05  | 20,691 (28.3)           | 20,448 (27.9)             | -0.007  |
| Other arthritis            | 64,949 (22.8)            | 15,887 (21.7)             | -0.03  | 16,126 (22)             | 15,872 (21.7)             | -0.008  |
| PUD                        | 66,005 (23.2)            | 16,779 (22.9)             | -0.007 | 16,941 (23.1)           | 16,759 (22.9)             | -0.006  |
| Pancreatitis               | 4,093 (1.4)              | 1,014 (1.4)               | -0.005 | 1,010 (1.4)             | 1,009 (1.4)               | -0.0001 |
| UC                         | 434 (0.2)                | 98 (0.1)                  | -0.005 | 94 (0.1)                | 98 (0.1)                  | 0.002   |
| Crohn                      | 114 (0.04)               | 20 (0.03)                 | -0.007 | 16 (0.02)               | 20 (0.03)                 | 0.004   |

|                          |                |               |        |               |               |         |
|--------------------------|----------------|---------------|--------|---------------|---------------|---------|
| Asthma                   | 37,306 (13.1)  | 9,649 (13.2)  | 0.002  | 9,682 (13.2)  | 9,634 (13.2)  | -0.002  |
| COPD                     | 7,909 (2.8)    | 1,343 (1.8)   | -0.06  | 1,379 (1.9)   | 1,342 (1.8)   | -0.004  |
| Bladder stone            | 195 (0.1)      | 36 (0.1)      | -0.008 | 35 (0.1)      | 36 (0.1)      | 0.0006  |
| Dementia                 | 29,125 (10.2)  | 5,480 (7.5)   | -0.1   | 5,542 (7.6)   | 5,478 (7.5)   | -0.003  |
| Electrolyte Imbalance    | 15,403 (5.4)   | 3,457 (4.7)   | -0.03  | 3,436 (4.7)   | 3,451 (4.7)   | 0.001   |
| Glaucoma /Cataract       | 64,771 (22.8)  | 15,888 (21.7) | -0.03  | 16,029 (21.9) | 15,857 (21.7) | -0.006  |
| HONK                     | 1,613 (0.6)    | 373 (0.5)     | -0.008 | 370 (0.5)     | 372 (0.5)     | 0.0004  |
| HTN nephropathy          | -              | -             | -      | -             | -             | -       |
| Hyperthyroid disease     | 5,679 (2)      | 1,575 (2.2)   | 0.01   | 1,594 (2.2)   | 1,570 (2.1)   | -0.002  |
| Hypothyroid disease      | 15,581 (5.5)   | 4,918 (6.7)   | 0.05   | 4,911 (6.7)   | 4,908 (6.7)   | -0.0002 |
| Osteomyelitis            | 2,006 (0.7)    | 365 (0.5)     | -0.03  | 354 (0.5)     | 365 (0.5)     | 0.002   |
| Pneumonia                | 20,378 (7.2)   | 4,604 (6.3)   | -0.04  | 4,637 (6.3)   | 4,597 (6.3)   | -0.002  |
| Skin infection           | 1,2045 (4.2)   | 3,213 (4.4)   | 0.007  | 3,255 (4.5)   | 3,208 (4.4)   | -0.003  |
| Glucose-lowering therapy |                |               |        |               |               |         |
| Metformin                | 177,686 (62.4) | 48,848 (66.6) | 0.09   | 48,963 (66.9) | 48,756 (66.6) | -0.006  |
| Insulins                 | 36,597 (12.9)  | 10,158 (13.9) | 0.03   | 10,093 (13.8) | 10,110 (13.8) | 0.0007  |
| SUs                      | 111,365 (39.1) | 32,123 (43.8) | 0.1    | 32,448 (44.3) | 32,043 (43.8) | -0.01   |
| Glitazones               | 20,763 (7.3)   | 7,887 (10.8)  | 0.1    | 7,997 (10.9)  | 7,852 (10.7)  | -0.006  |
| GLP-1 agonists           | 481 (0.2)      | 490 (0.7)     | 0.08   | 377 (0.5)     | 450 (0.6)     | 0.01    |
| AGIs                     | 9,103 (3.2)    | 1,898 (2.6)   | -0.04  | 1,949 (2.7)   | 1,896 (2.6)   | -0.005  |
| Meglitinides             | 1,205 (0.4)    | 298 (0.4)     | -0.003 | 316 (0.4)     | 298 (0.4)     | -0.004  |
| Co-medications           |                |               |        |               |               |         |
| Anticoagulants           | 96,281 (33.8)  | 27,394 (37.4) | 0.07   | 27,486 (37.5) | 27,338 (37.3) | -0.004  |
| Antiplatelets            | 93,509 (32.9)  | 26,625 (36.3) | 0.07   | 26,839 (36.7) | 26,571 (36.3) | -0.008  |
| Heparins                 | 5,407 (1.9)    | 1,313 (1.8)   | -0.008 | 1,304 (1.8)   | 1,310 (1.8)   | 0.0006  |
| Thrombolytics            | 256 (0.1)      | 25 (0.03)     | -0.02  | 19 (0.03)     | 25 (0.03)     | 0.005   |
| Statins                  | 142,130 (49.9) | 45,578 (62.2) | 0.2    | 45,648 (62.4) | 45,478 (62.1) | -0.005  |
| Other lipid Lowerings    | 28,350 (10.0)  | 10,508 (14.3) | 0.1    | 10,417 (14.2) | 10,467 (14.3) | 0.002   |
| Nitrates                 | 14,790 (5.2)   | 4,815 (6.6)   | 0.06   | 4,850 (6.6)   | 4,796 (6.6)   | -0.003  |
| Digoxin                  | 13,182 (4.6)   | 4,326 (5.9)   | 0.06   | 4,360 (6)     | 4,309 (5.9)   | -0.003  |
| ACEIs                    | 6,375 (2.2)    | 2,228 (3.0)   | 0.05   | 2,272 (3.1)   | 2,212 (3.0)   | -0.005  |
| ARBs                     | 122,463 (43.0) | 36,242 (49.4) | 0.1    | 36,418 (49.7) | 36,159 (49.4) | -0.007  |
| Entresto                 | 14 (0.01)      | 32 (0.04)     | 0.02   | 12 (0.02)     | 25 (0.03)     | 0.01    |
| Other Anti HTNs          | 123,988 (43.6) | 33,223 (45.3) | 0.04   | 33,349 (45.6) | 33,149 (45.3) | -0.006  |
| Loop diuretics           | 19,711 (6.9)   | 4,613 (6.3)   | -0.03  | 4,635 (6.3)   | 4,596 (6.3)   | -0.002  |
| Other diuretics          | 58,239 (20.5)  | 15,990 (21.8) | 0.03   | 16,112 (22)   | 15,952 (21.8) | -0.006  |
| Antianxieties            | 103,758 (36.5) | 24,669 (33.6) | -0.06  | 24,744 (33.8) | 24,634 (33.7) | -0.003  |
| Antipsychotics           | 10,823 (3.8)   | 1,977 (2.7)   | -0.06  | 2,083 (2.8)   | 1,976 (2.7)   | -0.009  |
| Antidepressants          | 38,511 (13.5)  | 9,174 (12.5)  | -0.03  | 9,301 (12.7)  | 9,159 (12.5)  | -0.01   |
| Dementia                 | 29,125 (10.2)  | 5,480 (7.5)   | -0.1   | 5,542 (7.6)   | 5,478 (7.5)   | -0.003  |
| Antiparkinsons           | 6,034 (2.1)    | 1,083 (1.5)   | -0.05  | 1,119 (1.5)   | 1,081 (1.5)   | -0.004  |



|                      |                |               |       |               |               |        |
|----------------------|----------------|---------------|-------|---------------|---------------|--------|
| Anticonvulsants      | 5,421 (1.9)    | 1,133 (1.6)   | -0.03 | 1,127 (1.5)   | 1,130 (1.5)   | 0.0003 |
| NSAIDs               | 216,954 (76.2) | 56,826 (77.5) | 0.03  | 57,157 (78.1) | 56,748 (77.5) | -0.01  |
| Bisphos<br>-phonates | 10,443 (3.7)   | 1,774 (2.4)   | -0.07 | 1,785 (2.4)   | 1,773 (2.4)   | -0.001 |
| Opioids              | 123,349 (43.3) | 30,499 (41.6) | -0.04 | 30,653 (41.9) | 30,459 (41.6) | -0.005 |

Values are represented as mean  $\pm$  standard deviation or number (%); ACEis, angiotensin-converting enzyme inhibitors; AGIs,  $\alpha$ -glucosidase Inhibitors; ARBs, angiotensin II receptor blockers; CABG, coronary artery bypass graft; CAD, coronary artery disease; COPD, chronic obstructive pulmonary disease; CV, cardiovascular; DM, diabetes mellitus; HONK, hyperglycaemic hyperosmolar nonketotic coma; HTN, hypertensive; MI, myocardial infarction; NSAIDs, non-steroidal anti-inflammatory drugs; PAD, peripheral artery disease; PUD, peptic ulcer disease; STD, standardized difference; SUs, sulfonylureas; UC, ulcerative colitis;

**Table S4.** Sensitivity analysis

| <b>Outcomes</b>                            | <b>Adjusted hazard ratio (95% CI)</b> |                               |                                |
|--------------------------------------------|---------------------------------------|-------------------------------|--------------------------------|
|                                            | <b>Original analysis</b>              | <b>Sensitivity analysis I</b> | <b>Sensitivity analysis II</b> |
| <i>MACEs</i>                               | 0.74 (0.64, 0.85)                     | 0.78 (0.62, 0.97)             | 0.73 (0.63, 0.86)              |
| <i>All-cause death</i>                     | 0.47 (0.33, 0.68)                     | 0.66 (0.44, 0.97)             | 0.76 (0.59, 0.97)              |
| <i>Myocardial infarction</i>               | 0.60 (0.45, 0.81)                     | 0.45 (0.34, 0.60)             | 0.41 (0.33, 0.52)              |
| <i>Stroke</i>                              | 0.92 (0.74, 1.13)                     | 0.99 (0.72, 1.34)             | 1.02 (0.79, 1.32)              |
| <i>Hospitalization for unstable angina</i> | 0.67 (0.57, 0.79)                     | 0.68 (0.55, 0.84)             | 0.72 (0.60, 0.85)              |
| <i>Coronary revascularization</i>          | 0.79 (0.65, 0.97)                     | 0.76 (0.61, 0.96)             | 0.79 (0.66, 0.96)              |
| <i>Transient ischemic attack</i>           | 0.92 (0.72, 1.17)                     | 0.89 (0.69, 1.14)             | 0.92 (0.72, 1.18)              |
| <i>Hospitalization for heart failure</i>   | 0.66 (0.55, 0.80)                     | 0.65 (0.50, 0.83)             | 0.68 (0.56, 0.84)              |
| <i>Hypoglycemic adverse event</i>          | 0.78 (0.62, 0.97)                     | 0.73 (0.54, 0.98)             | 0.75 (0.59, 0.94)              |
| <i>Urinary tract infection</i>             | 0.90 (0.82, 0.98)                     | 0.84 (0.76, 0.93)             | 0.90 (0.83, 0.98)              |
| <i>Genital infection</i>                   | 1.43 (1.27, 1.61)                     | 1.57 (1.37, 1.80)             | 1.45 (1.29, 1.63)              |
| <i>Acute kidney injury</i>                 | 0.94 (0.76, 1.17)                     | 0.77 (0.57, 1.03)             | 0.95 (0.75, 1.20)              |
| <i>Volume depletion</i>                    | 0.90 (0.78, 1.04)                     | 0.94 (0.79, 1.12)             | 0.95 (0.82, 1.11)              |
| <i>Diabetic ketoacidosis</i>               | 0.96 (0.60, 1.54)                     | 0.86 (0.49, 1.50)             | 1.05 (0.63, 1.75)              |
| <i>Thromboembolic event</i>                | 0.88 (0.73, 1.05)                     | 0.91 (0.73, 1.13)             | 0.91 (0.75, 1.09)              |
| <i>Fracture</i>                            | 1.03 (0.92, 1.14)                     | 1.13 (0.99, 1.29)             | 1.09 (0.97, 1.22)              |
